# Supplementary material for: The Role of Peripheral Inflammation in Clinical Outcome and Brain Imaging Abnormalities in Psychosis: A Systematic Review
Source: Frontiers journal article supplement (doi:10.3389/fpsyt.2021.612471), 2021-02-19
Supplement: Data_Sheet_2.pdf [file Data_Sheet_2.pdf]

**Appendix B.** Newcastle Ottawa Scale for the assessment of the quality of a case-control and cohort studies; a total of 9 stars can be awarded.

|                             |                                                        | Star awarded                                                                                                                                                                  | Star not awarded                                                                                |
|-----------------------------|--------------------------------------------------------|-------------------------------------------------------------------------------------------------------------------------------------------------------------------------------|-------------------------------------------------------------------------------------------------|
| <b>Case-control studies</b> |                                                        |                                                                                                                                                                               |                                                                                                 |
| <b>Selection</b>            | Is the case definition adequate?                       | Requires independent validation from researchers with reference to primary records (i.e. medical history or hospital records).                                                | Self-report or no description of how a patient was categorised as a case.                       |
|                             | Representativeness of the cases                        | Representative of general population of <u>patients with a clinical diagnosis of psychotic disorder</u> . All in defined catchment area, hospital/s, or clinic/s.             | Does not meet these requirements or study does not report how case participants were selected.  |
|                             | Selection of Controls                                  | From the community in the same geographical region                                                                                                                            | Hospital controls (other patients who do not meet the study inclusion criteria for case group). |
|                             | Definition of Controls                                 | No current or historical diagnosis of psychosis.                                                                                                                              | No information on history provided.                                                             |
| <b>Compa-rability</b>       | Matched in design?                                     | Can be awarded <u>up to two stars</u> if matched for <u>age and at least one other variable</u> . <u>Age must be one of the factors to be able to score 2 stars.</u>          | No                                                                                              |
| <b>Exposure</b>             | Ascertainment of exposure                              | Secure records or directly measured by clinicians and/or researchers with a structured interview.                                                                             | Self-reported information.                                                                      |
|                             | Same method for both cases and controls?               | Yes.                                                                                                                                                                          | No.                                                                                             |
|                             | Same Non-Response rate?                                | Yes.                                                                                                                                                                          | No or no information on response rates and attrition were provided.                             |
| <b>Cohort studies</b>       |                                                        |                                                                                                                                                                               |                                                                                                 |
| <b>Selection</b>            | Representativeness of the cohort                       | Representative of general population of <u>patients with a clinical diagnosis of psychotic disorder</u> . All in defined catchment area, hospital/s, or clinic/s.             | Does not meet these requirements or study does not report how case participants were selected.  |
|                             | Selection of non-intervention cohort                   | From the same defined catchment area as the exposed cohort.                                                                                                                   | Different setting from the exposed cohort.                                                      |
|                             | Ascertainment of exposure                              | Secure records or directly measured by clinicians and/or researchers with a structured interview.                                                                             | Self-reported information.                                                                      |
|                             | Outcome of interest was not present at start           | Yes.                                                                                                                                                                          | No.                                                                                             |
| <b>Compa-rability</b>       | Matched in design?                                     | Can be awarded <u>up to two stars</u> if matched/adjusted for <u>age and at least one other variable</u> . <u>Age must be one of the factors to be able to score 2 stars.</u> | No.                                                                                             |
| <b>Outcome</b>              | Assessment of outcome                                  | Secure records or directly measured by clinicians and/or researchers with a structured interview.                                                                             | Self-reported information or no follow-up conducted.                                            |
|                             | Follow-up long enough for outcomes? ( $\geq 2$ months) | Yes.                                                                                                                                                                          | Less than 2 months or no follow-up conducted.                                                   |
|                             | Adequacy of follow-up cohorts                          | Adjusted for missing data or follow-up was less than 2 months after baseline.                                                                                                 | No information on missing data, follow-up, or no follow-up conducted.                           |
